# Supplementary material for: Preparation and Boron Removal Performance of Glycidol Modified PANI Nanorods: An Optimization Study Based on Response Surface Methodology
Source: MDPI journal article supplement (doi:10.3390/polym15020459), 2023-01-15
Supplement: s1 [file s1]

*Article*

# **Preparation and boron removal performance of glycidol modified PANI nanorods: an optimization study based on response surface methodology**

**Yunlong Le, Yunshan Guan \*, XiaoYing Ma and Weidong Zhang \***

College of Chemical Engineering, Qinghai University, Xining 810016, China

\* Correspondence: qh-gys@163.com (Y.G.); weidzhang1208@126.com (W.Z.);

Tel.: +86-18997298841 (W.Z.); Tel.: +86-13186052872 (Y.G.)

**Table S1.** Low- and high-level values for the independent variables

| Factors                  | Symbol              | Unit   | Code level |            |
|--------------------------|---------------------|--------|------------|------------|
|                          |                     |        | Low level  | High level |
| Adsorption time          | A                   | h      | 6          | 10         |
| Boric acid concentration | B                   | mg/L   | 1200       | 1400       |
| pH                       | C                   | —      | 9          | 11         |
| Response                 | Adsorption capacity | mmol/g |            |            |

**Table S2.** Parameters of kinetic model fitting for PANI-OH adsorbed boron

| Models and parameters | Pseudo-first-order kinetics model  |        |        | Pseudo-second order kinetic model                            |        |        |
|-----------------------|------------------------------------|--------|--------|--------------------------------------------------------------|--------|--------|
|                       | $\ln(q_e - q_t) = \ln q_e - k_1 t$ |        |        | $\frac{t}{q_t} = \frac{1}{k_2 \times q_e^2} + \frac{t}{q_e}$ |        |        |
|                       | $k_1$                              | $q_e$  | $R^2$  | $k_2$                                                        | $q_e$  | $R^2$  |
| value                 | 0.2848                             | 0.2116 | 0.9950 | 1.044                                                        | 0.2844 | 0.9919 |

**Table S3.** Fitting parameters of internal diffusion model of adsorbate to adsorbent PANI-OH

| Model parameter | Intraparticle diffusion model |         |         |
|-----------------|-------------------------------|---------|---------|
|                 | $q = kt^{0.5} + c$            |         |         |
|                 | k                             | c       | $R^2$   |
| value           | 0.0621                        | 0.01836 | 0.94931 |

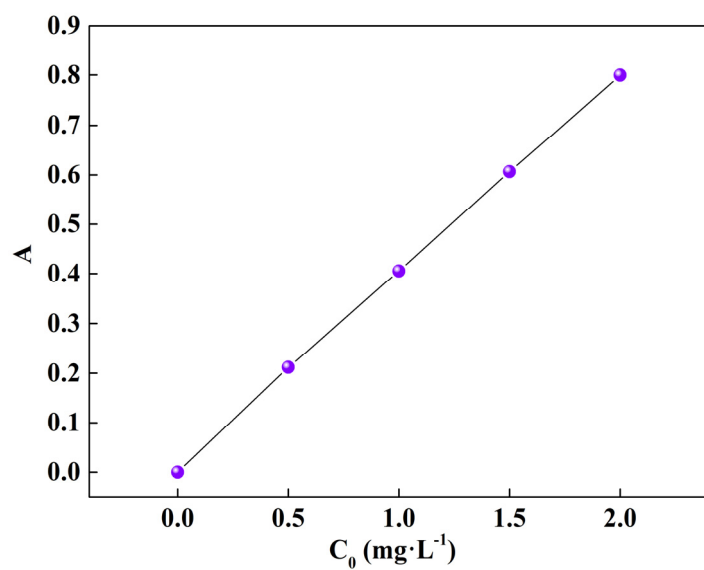

**Figure S1.** Standard curve of boron concentration

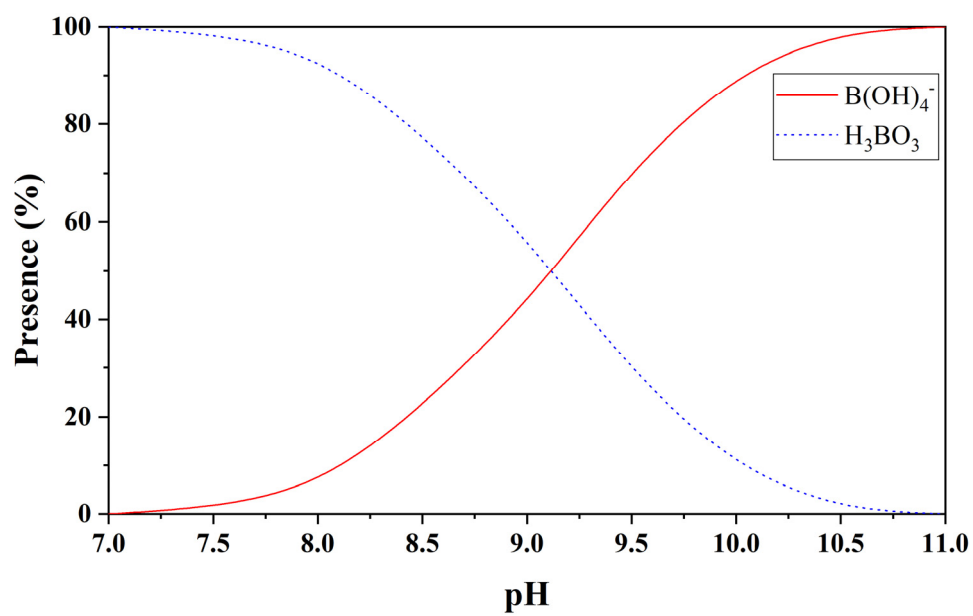

**Figure S2.** Fraction of boron in the aqueous solution at different pH values.
